# Supplementary material for: Integrative Metabolome and Transcriptome Analyses Reveal the Molecular Mechanism of Yellow-Red Bicolor Formation in Kalanchoe blossfeldiana Petals
Source: MDPI journal article supplement (doi:10.3390/horticulturae9070844), 2023-07-24
Supplement: s1 [file s1]

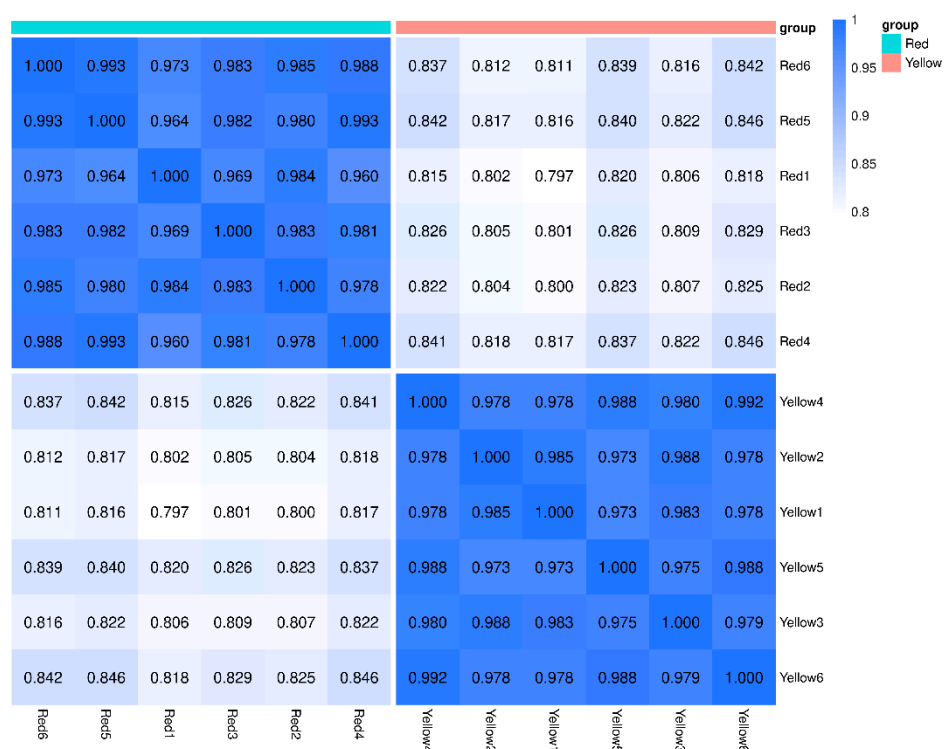

Figure S1. Correlation analysis among different samples

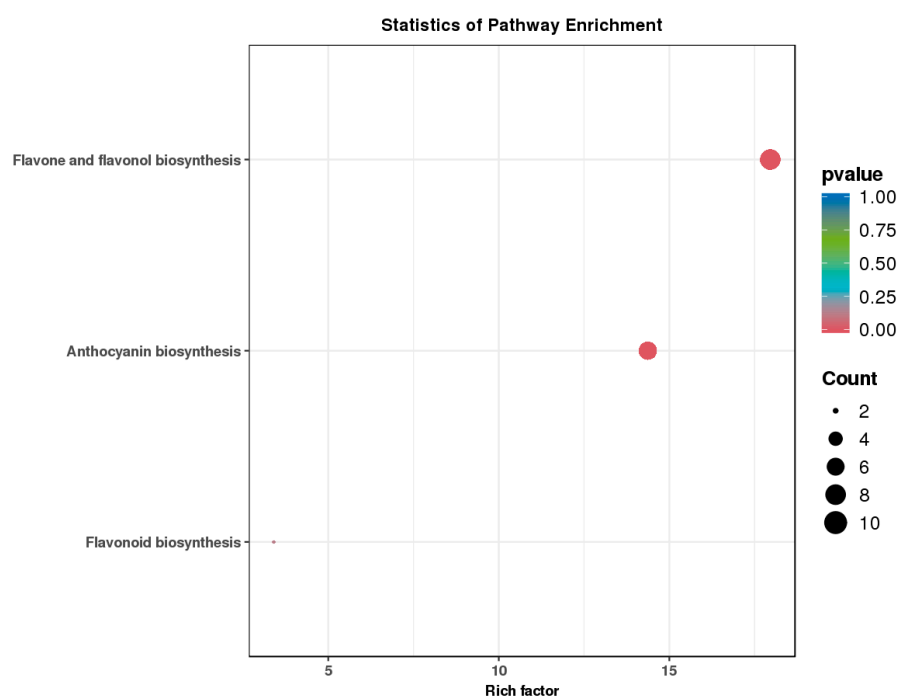

Figure S2. KEGG enrichment analysis of differentially accumulated pigments

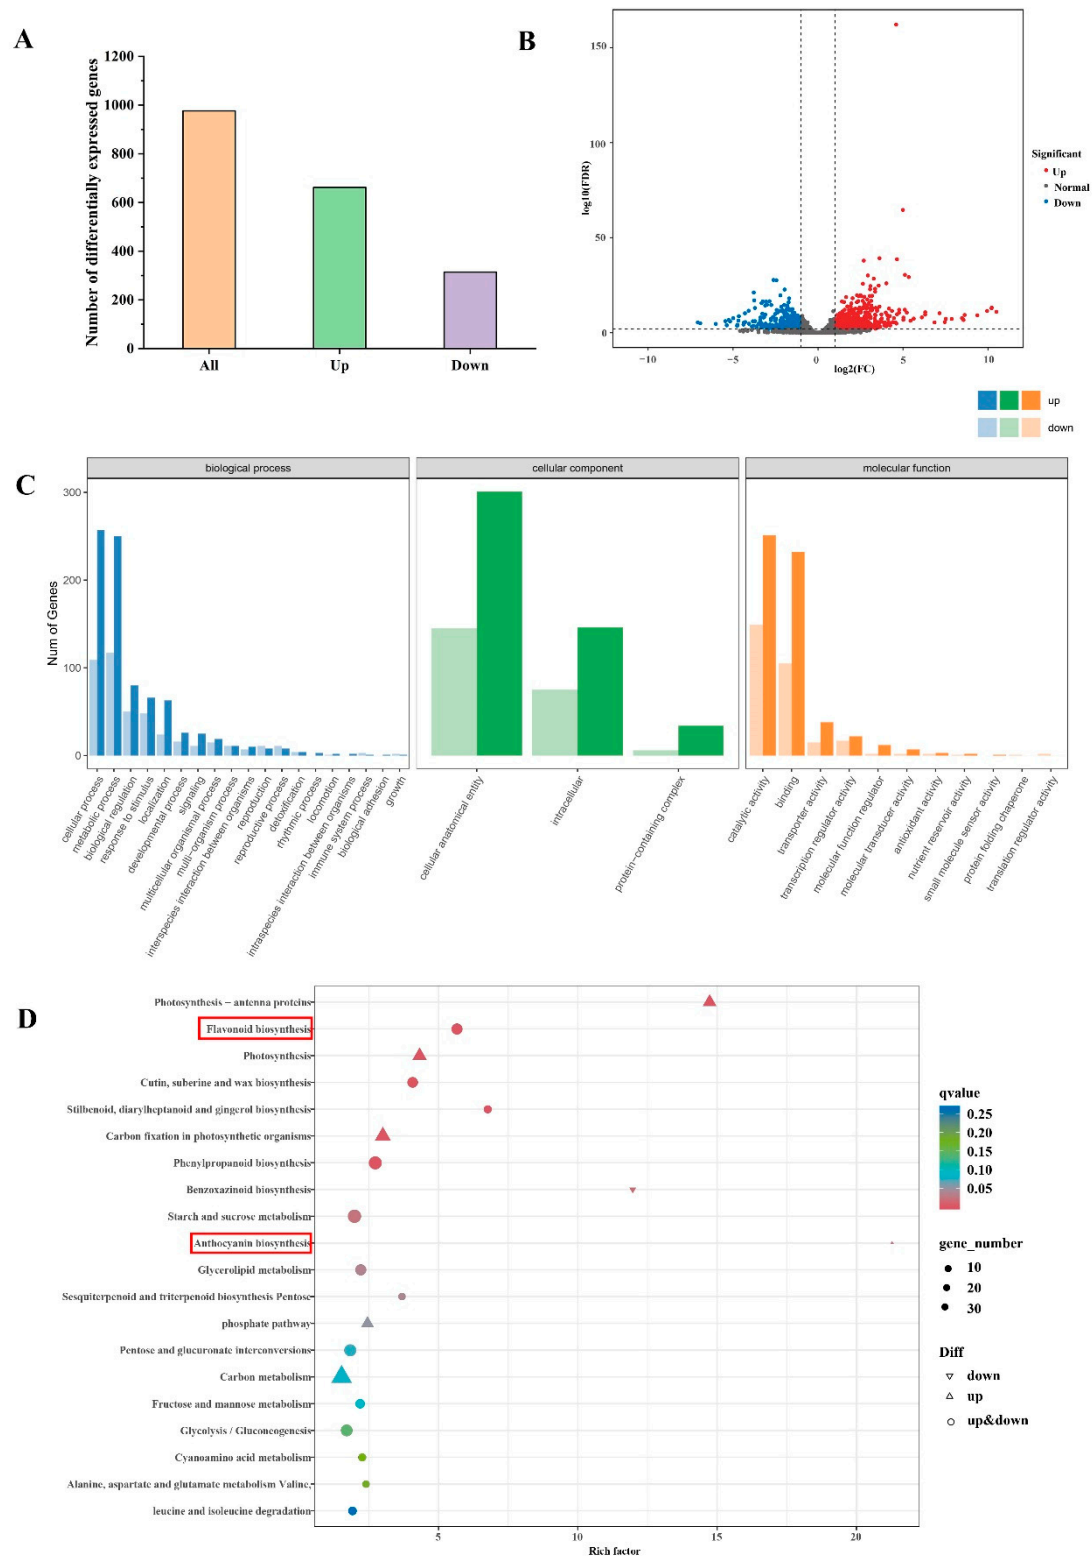

Figure S3. DEG analysis of yellow and red regions in *Kalanchoe blossfeldiana* petals. (A) Statistics of DEGs. (B) Volcano plot of DEGs represented by  $\log_2(\text{FC})$  and  $-\log_{10}(\text{FDR})$ . (C) The GO enrichment analysis of DEGs. (D) The KEGG enrichment analysis of DEGs.
