# Supplementary material for: Integrative Metabolome and Transcriptome Analyses Reveal the Molecular Mechanism of Yellow-Red Bicolor Formation in Kalanchoe blossfeldiana Petals
Source: MDPI journal article supplement (doi:10.3390/horticulturae9070844), 2023-07-24
Supplement: s1 [file s1]

Archive with 2 entries (2 files):
- Supplemental figures.pdf
- Supplemental tables.xlsx
