# Supplementary material for: Integrative Metabolome and Transcriptome Analyses Reveal the Molecular Mechanism of Yellow-Red Bicolor Formation in Kalanchoe blossfeldiana Petals
Source: MDPI journal article supplement (doi:10.3390/horticulturae9070844), 2023-07-24
Supplement: s1 [file s1 › Supplemental tables.xlsx]

## Sheet: Table S1
	Table S1 Primers used in the qRT-PCR
	Gene ID	Rename	Primer sequence
	TRINITY_DN196_c0_g1	Kb4CL	F: GCGGAAATGCGGTGGTGT
			R: CCGCTTCCGTCATTCCAT
	TRINITY_DN44965_c0_g1	KbCHS	F: GGCAAGGGTCCTCGTGGT
			R: CCGAGATGCCGAGTGGTT
	TRINITY_DN7032_c0_g1	KbCHI	F: ATCAAGGGGTCACAGTACGGG
			R: GGGAAGGTGTAGGTGATGACGG
	TRINITY_DN8688_c0_g1	KbF3H	F: GTGGAAGGACAATAACTGGGTGGC
			R: GAACGCTCTTGTACTTTCCATTGC
	TRINITY_DN41_c0_g1	KbDFR	F: CAAGATGACTGGATGGATGTATTTC
			R: TAGCGTTGTGAGAGGAGCAGAT
	TRINITY_DN7935_c0_g1	KbANS	F: GACAAGGAGGTGCGGGAGA
			R: TGCCGTATCCTTGAATCTGC
	TRINITY_DN22107_c0_g1	KbGT1	F: TCGCCTACCGCCAAATGA
			R: ACGGGAGTAGGAGCGAGTAGAC
	TRINITY_DN16464_c0_g1	KbGT2	F: GAGCCTTGCCCAAAGCCACT
			R: TGCGGCACGAGGTGGTTT
	TRINITY_DN9743_c0_g2	KbGT3	F: CGTGTCGTTCGGCAGCAT
			R: GCTTCCGTATTCTCTGATGACC
	TRINITY_DN714_c0_g1	KbbHLH1	F: ACACGCCTCAACGCCGAAAC
			R: CCACTCTGCCACTGACCCTGCC

## Sheet: Table S2
	Table S2 Differentially accumulated flavonoids of yellow and red regions in Kalanchoe blossfeldiana petals
	ID	name	subclass	Yellow	Red	regulated	KEGG_pathway_annotation
	neg_1706	Cyanidin-3-(p-coumaroyl)-rutinoside-5-glucoside	anthocyanin	0.0±0.0	669.1±216.3	up	Anthocyanin biosynthesis(ko00942)
	neg_3363	Cyanidin 5-O-beta-D-glucoside 3-O-beta-D-sambubioside	anthocyanin	53.9±10.6	139.2±9.1	up	Anthocyanin biosynthesis(ko00942)
	neg_3633	Cyanidin 3-O-(2-O-beta-D-glucuronosyl)-beta-D-glucoside	anthocyanin	19.0±7.8	61.0±11.4	up	Anthocyanin biosynthesis(ko00942)
	pos_2785	Cyanidin 3-(6-p-caffeoyl)glucoside	anthocyanin	3.0±0.6	102.2±14.3	up	Anthocyanin biosynthesis(ko00942)
	neg_1968	Pelargonidin 3-O-glucoside	anthocyanin	21.8±6.3	109.3±13.5	up	Anthocyanin biosynthesis(ko00942)
	pos_2611	Pelargonidin 3-O-rutinoside 5-O-beta-D-glucoside	anthocyanin	62.1±9.5	122.7±14.3	up	Anthocyanin biosynthesis(ko00942)
	pos_3259	Pelargonidin 3-O-(6-caffeoyl-beta-D-glucoside)	anthocyanin	2.3±0.8	24.3±5.4	up	Anthocyanin biosynthesis(ko00942)
	pos_1985	Cyanin	anthocyanin	793.6±32.9	17262.2±1134.8	up	Anthocyanin biosynthesis(ko00942)
	neg_1820	Dihydromyricetin	flavonoid	6.2±2.3	216.3±45.4	up	Flavonoid biosynthesis(ko00941)
	neg_1914	5,7-Dihydroxyflavone	flavones	52.2±9.5	138.9±25.1	up	Flavonoid biosynthesis(ko00941)
	neg_1765	Luteolin 7-O-[beta-D-glucuronosyl-(1->2)-beta-D-glucuronide]	flavones	284.2±17.5	3123.1±248.6	up	Flavone and flavonol biosynthesis(ko00944)
	pos_3233	Luteolin 7-O-beta-D-glucoside	flavones	91.0±14.4	306.2±30.2	up	Flavone and flavonol biosynthesis(ko00944)
	pos_2366	Luteolin 7-O-[beta-D-glucuronosyl-(1->2)-beta-D-glucuronide]-4'-O-beta-D-glucuronide	flavones	85.5±6.0	40.5±4.3	down	Flavone and flavonol biosynthesis(ko00944)
	pos_4105	Luteolin 7-O-glucuronide	flavones	14.7±3.3	115.2±23.9	up	Flavone and flavonol biosynthesis(ko00944)
	neg_3594	Apigenin 7-O-neohesperidoside	flavones	874.5±56.4	423.6±31.9	down	Flavone and flavonol biosynthesis(ko00944)
	neg_1794	3,7,4'-Tri-O-methylquercetin	flavonols	51.9±13.5	2692.7±247.5	up	Flavone and flavonol biosynthesis(ko00944)
	neg_2892	Quercetin 3-O-rhamnoside 7-O-glucoside	flavonols	36.8±13.7	973.7±161.3	up	Flavone and flavonol biosynthesis(ko00944)
	pos_2254	Quercetin 3-O-(6-O-malonyl-beta-D-glucoside)	flavonols	172.6±26.0	806.0±95.5	up	Flavone and flavonol biosynthesis(ko00944)
	pos_3524	Quercetin 3-O-beta-D-glucosyl-(1->2)-beta-D-glucosyl-(1->2)-beta-D-glucoside	flavonols	119.8±4.2	35.9±3.5	down	Flavone and flavonol biosynthesis(ko00944)
	neg_2271	Kaempferol 3-O-glucoside	flavonols	45.8±13.9	380.8±96.4	up	Flavone and flavonol biosynthesis(ko00944)

## Sheet: Table S3
	Table S3. Summary of sequencing and assembly quality in RNA-Seq
	Transcriptome quality	Summary	Statistics
	Sequencing	Total clean data (Gb)	37.62
		Q30 percentage(%)	95.6
		GC percentage(%)	47.64
	Assembly quality of transcripts	Total number	179113
		200-300 bp	28196
		300-500 bp	30607
		500-1000 bp	43411
		1000-2000 bp	45709
		＞2000 bp	31190
		Total length(bp)	212143131
		Mean length(bp)	1184
		N50	1839
	Assembly quality of unigenes	Total number	69204
		200-300 bp	20724
		300-500 bp	16474
		500-1000 bp	13517
		1000-2000 bp	9909
		＞2000 bp	8580
		Total length(bp)	62284812
		Mean length(bp)	900
		N50	1726

## Sheet: Table S4
	Table S4. Summary of annotated unigenes
	Database	Annotated number	Percentage%
	COG	7377	0.106598
	GO	28552	0.412577
	KEGG	22509	0.325256
	KOG	19268	0.278423
	Pfam	20302	0.293365
	Swissprot	23104	0.333854
	eggNOG	29024	0.419398
	NR	33704	0.487024
	All annotated	34991	0.505621

## Sheet: Table S5
	Table S5 DEGs involved in anthocyanin biosynthesis in Kalanchoe blossfeldiana petals
	Gene ID	Length	BLAST Result	Rename	FPKM		Regulated
					Yellow	Red
	TRINITY_DN196_c0_g1	753	4-coumarate--CoA ligase	Kb4CL	20.95±5.56	6.90±1.11	down
	TRINITY_DN44965_c0_g1	1170	chalcone synthase	KbCHS	33.28±8.38	189.96±11.61	up
	TRINITY_DN7032_c0_g1	471	chalcone isomerase	KbCHI	19.87±1.88	110.58±15.55	up
	TRINITY_DN8688_c0_g1	1074	flavonol synthase/flavanone 3-hydroxylase	KbF3H	21.90±3.73	51.14±14.26	up
	TRINITY_DN41_c0_g1	975	dihydroflavonol 4-reductase	KbDFR	49.51±2.76	143.09±21.17	up
	TRINITY_DN7935_c0_g1	1080	anthocyanidin synthase	KbANS	16.56±2.86	116.83±30.48	up
	TRINITY_DN22107_c0_g1	1413	anthocyanidin 3-O-glucosyltransferase	KbGT1	2.40±0.44	6.74±1.52	up
	TRINITY_DN16464_c0_g1	882	anthocyanidin 3-O-glucosyltransferase	KbGT2	18.94±4.13	60.17±5.94	up
	TRINITY_DN9743_c0_g2	1404	UDP-glucose:flavonoid 7-O-glucosyltransferase	KbGT3	21.05±0.08	2.96±0.74	down
